# Supplementary material for: CO2-Breathing Prior to Simulated Diving Increases Decompression Sickness Risk in a Mouse Model: The Microbiota Trail Is Not Forgotten
Source: Preprints.org preprint supplement (doi:10.20944/preprints202406.1553.v1), 2024-06-21
Supplement: Supplementary file 1 [file supplementary]

**Supplementary data**


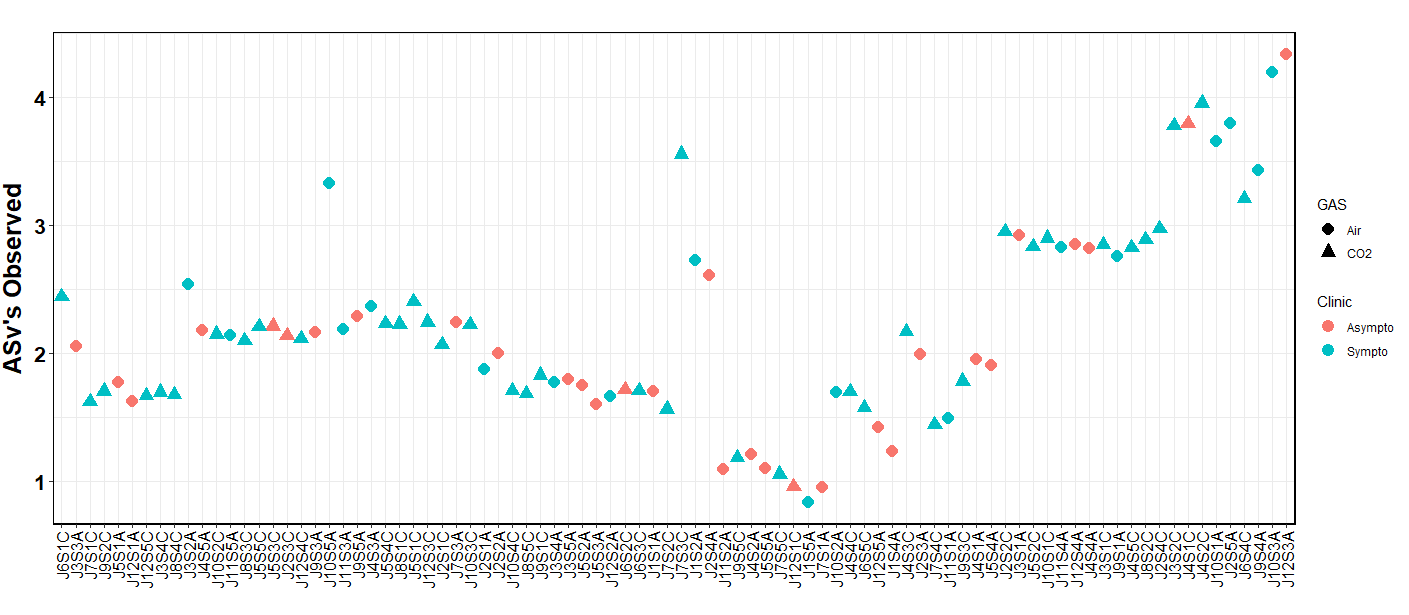


Figure 1 Distribution of Shannon diversity of microbial communities obtained with the 16 rDNA dataset. The colors represent the clinical group and the shape represents the gas group.


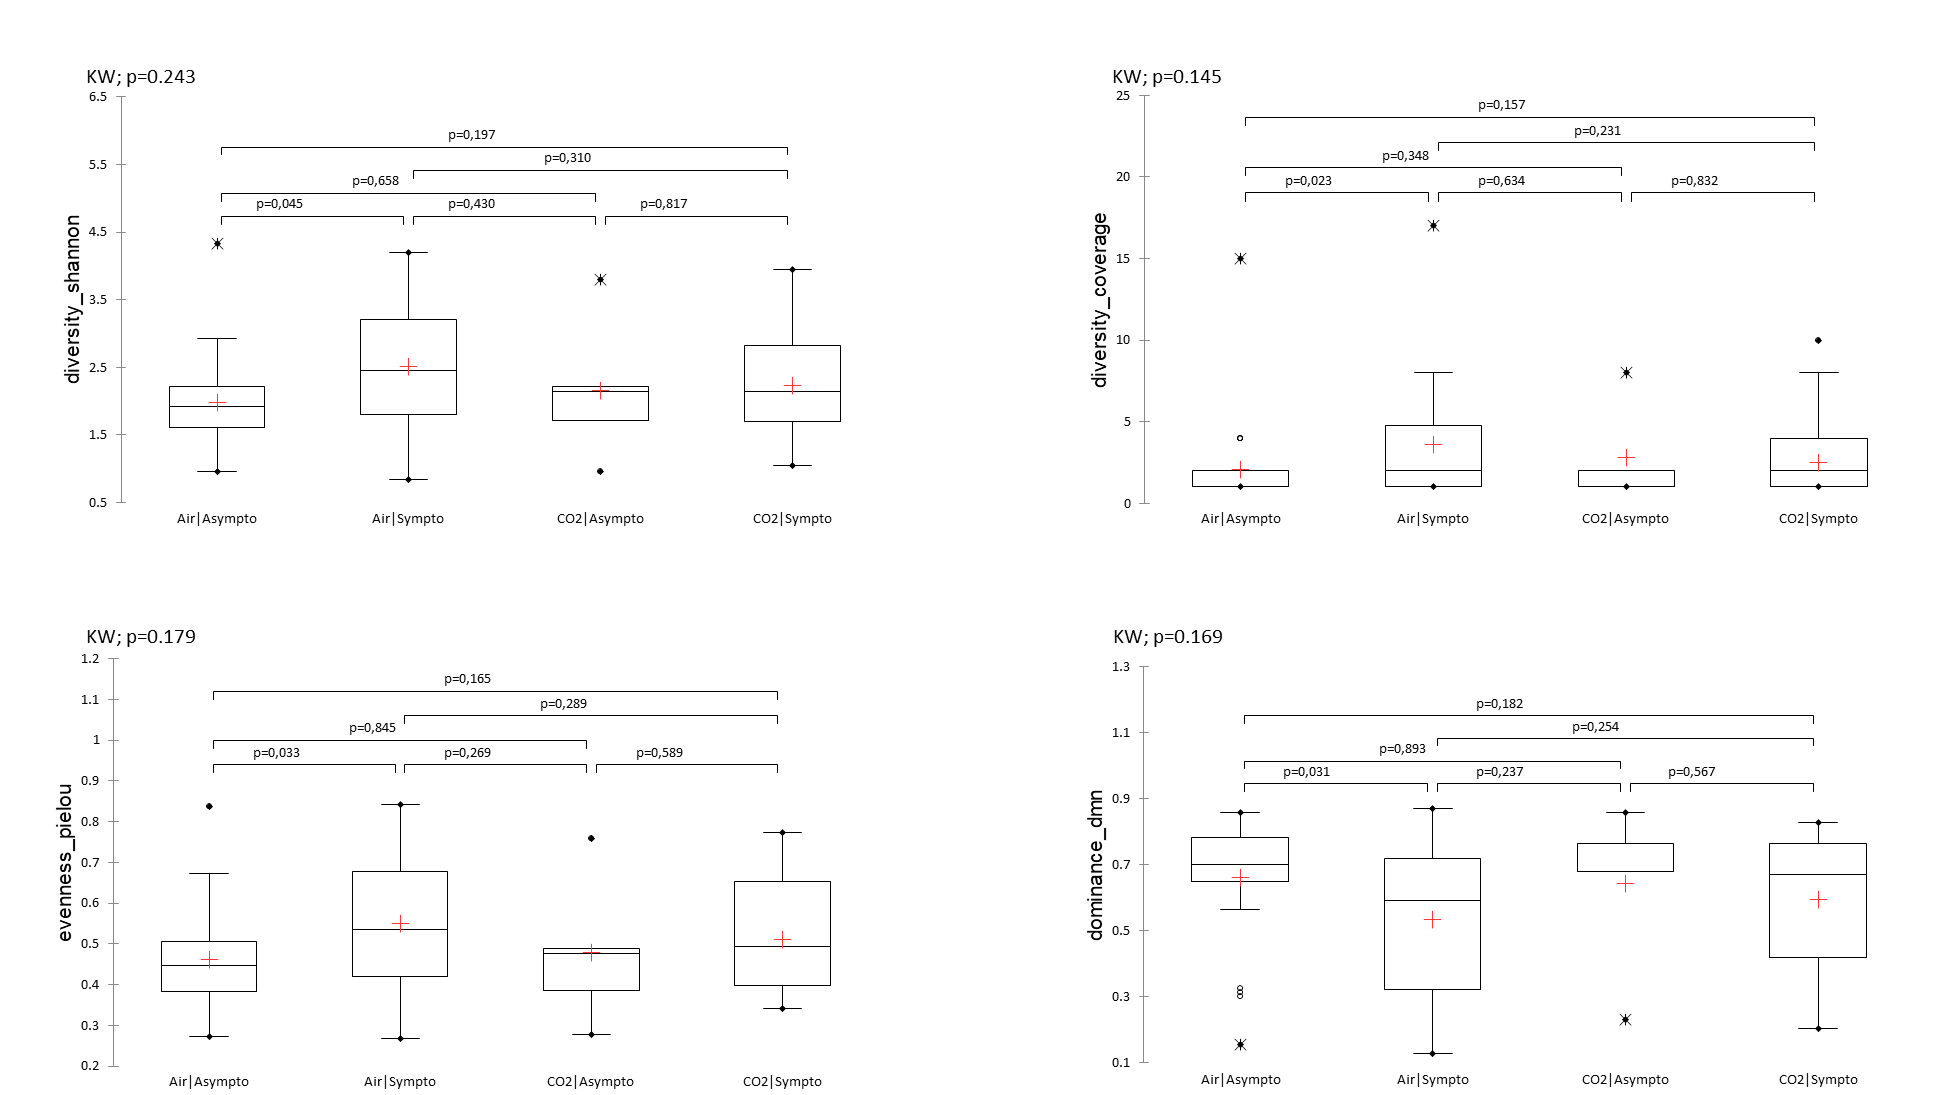


Figure 2 Diversity index. Kruskal-Wallis (KW) analysis with post-hoc dunn test (Bonferroni correction: 0,0083).


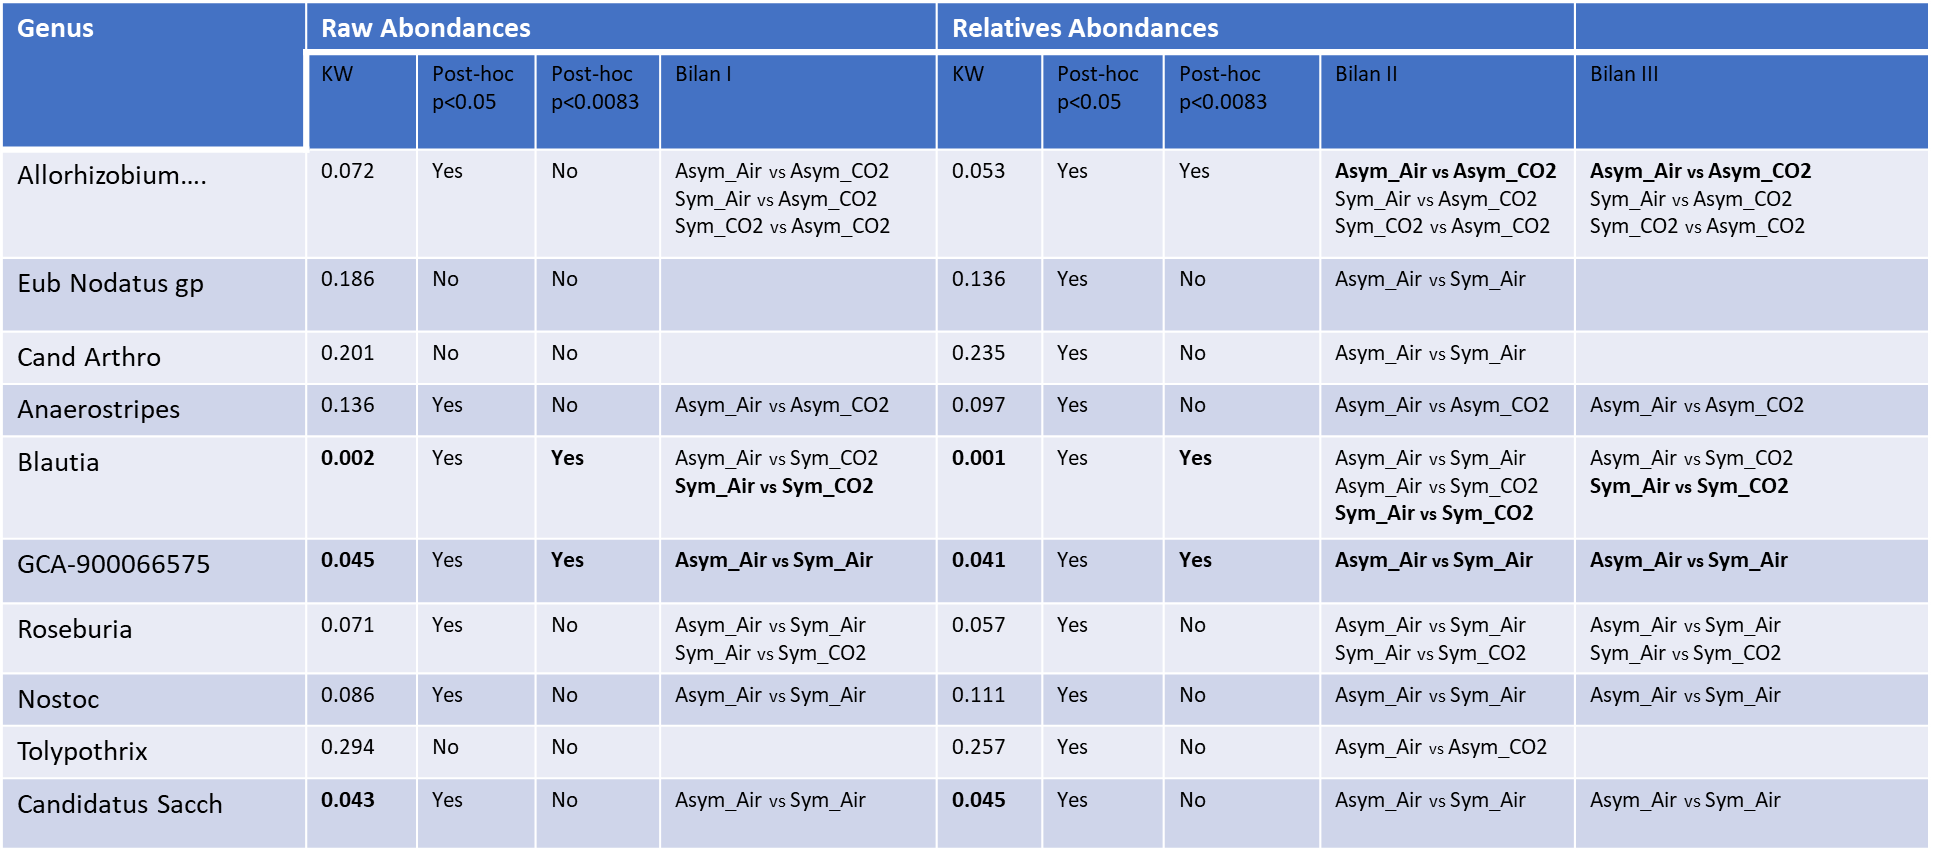


Table 1 Relative and raw abundances. Summary table according to Kruskal-Wallis (KW) analysis with post-hoc dunn test (Bonferroni correction: 0,0083).
